# Supplementary material for: Forest liming in the face of climate change: the implications of restorative liming for soil organic carbon in mature German forests
Source: Copernicus journal article supplement (doi:10.5194/soil-9-39-2023), 2023-01-12
Supplement: Supplementary file 1 [file soil-9-39-2023-supplement.pdf]

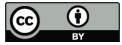

*Supplement of*

## **Forest liming in the face of climate change: the implications of restorative liming for soil organic carbon in mature German forests**

**Oliver van Straaten et al.**

*Correspondence to:* Ulrike Talkner ([ulrike.talkner@nw-fva.de](mailto:ulrike.talkner@nw-fva.de))

The copyright of individual parts of the supplement might differ from the article licence.

## Supplementary information

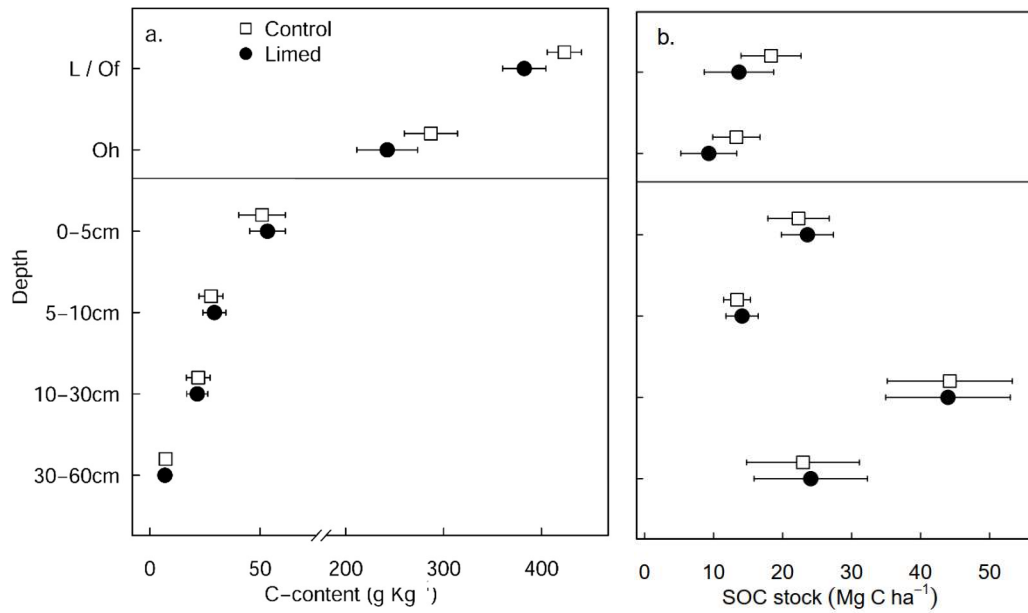

**Figure S1:** (a) Mean SOC contents in the limed and control plots and (b) mean SOC stocks in the limed and control plots (forest floor layer n=28, mineral soil n=26). Error bars indicate the 95 % confidence intervals based on Student's T distribution.

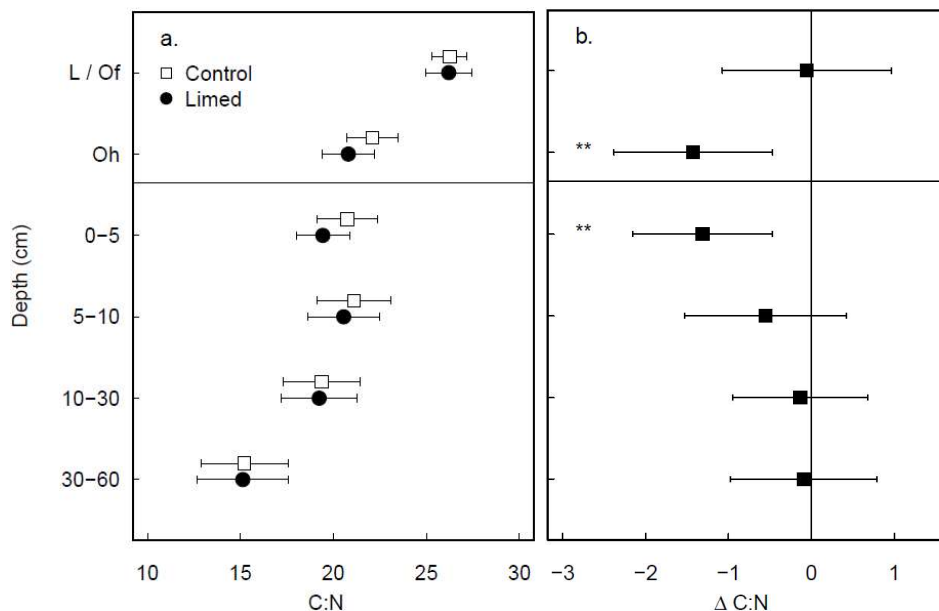

**Figure S2:** (a) Mean C:N ratio of limed and control plots and (b) treatment difference at different depths in the 60 cm soil profile. Error bars indicate the 95 % confidence intervals based on Student's T distribution. Forest floor layer n=28, Mineral soil n=26. Statistical significance was tested using LME models for each respective soil depth / layer at  $P \leq 0.05$  (\*) and  $P \leq 0.01$  (\*\*).

**Table S1:** Years when forest floor and mineral soil samples were collected from the different sites.

| Site name            | Species | Forest floor                 | Mineral soil           |
|----------------------|---------|------------------------------|------------------------|
| Dassel 325           | Spruce  | 1990, 1998, 2004, 2011, 2015 | 1998, 2011, 2015       |
| Dassel 4227          | Beech   | 1998, 2004, 2012, 2015, 2018 | 1998, 2012, 2018       |
| Eutin 402            | Spruce  | 1990, 1998, 2010             | 1998, 2010,            |
| Göhrde 129           | Spruce  | 1990, 1998, 2010, 2015       | 1990, 1998, 2010, 2015 |
| Göhrde 140           | Oak     | 1990, 1998, 2010, 2015       | 1990, 1998, 2010, 2015 |
| Göhrde 155           | Spruce  | 1990, 1998, 2013             | -                      |
| Göhrde 157           | Beech   | 1990, 1998, 2015, 2018       | 1990, 1998, 2018       |
| Grünenplan 142       | Beech   | 1990, 1998, 2009, 2015, 2018 | 1998, 2009, 2018       |
| Grünenplan 51        | Beech   | 1990, 2019                   | -                      |
| Hess. Lichtenau 2680 | Beech   | -                            | 2012, 2018             |
| Lauterberg 2023      | Spruce  | 2000, 2009, 2015             | -                      |
| Lauterberg 75        | Spruce  | -                            | 1998, 2005, 2015       |
| Rantzau 50           | Spruce  | 2000, 2010, 2017             | 2000, 2010, 2017       |
| Segeberg 244         | Spruce  | 1990, 1998, 2004, 2017       | -                      |
| Segeberg 517         | Spruce  | 2000, 2010, 2017             | 2000, 2010, 2017       |
| Sellhorn 34          | Beech   | 1990, 1998, 2010, 2015, 2018 | 1998, 2010, 2018       |
| Sellhorn 66          | Beech   | 1990, 1998, 2010, 2015       | 1998, 2010, 2015       |

**Table S2:** Spearman correlation coefficients of SOC stock in the control plots at different soil depths with explanatory variables (forest floor layer n = 28, mineral soil n = 26).

|                                       | L/O <sub>f</sub> | O <sub>h</sub> | 0-5 cm        | 5-10 cm       | 10-30 cm      | 30-60 cm       |
|---------------------------------------|------------------|----------------|---------------|---------------|---------------|----------------|
| Precipitation (mm a <sup>-1</sup> )   | -0.10            | -0.21          | 0.11          | 0.07          | 0.14          | 0.29           |
| Temperature (°C)                      | -0.26            | -0.06          | -0.16         | -0.24         | -0.37         | -0.31          |
| Elevation (m.asl)                     | -0.23            | -0.26          | -0.10         | -0.06         | 0.32          | 0.13           |
| N-deposition (kg N ha <sup>-1</sup> ) | <b>0.41*</b>     | 0.31           | 0.30          | 0.38          | 0.13          | 0.26           |
| Clay (%)                              | -                | -              | 0.49          | 0.51          | <b>0.62*</b>  | 0.23           |
| Sand (%)                              | -                | -              | <b>-0.62*</b> | <b>-0.56*</b> | -0.43         | -0.35          |
| C:N ratio                             | -0.01            | <b>0.65**</b>  | -0.05         | 0.11          | 0.13          | 0.32           |
| Base saturation (%)                   | 0.07             | 0.07           | -0.07         | -0.33         | -0.38         | <b>-0.48*</b>  |
| pH (H <sub>2</sub> O)                 | <b>-0.79**</b>   | <b>-0.67**</b> | -0.27         | -0.29         | <b>-0.41*</b> | <b>-0.63**</b> |

\* Indicates a P-value of ≤0.05, and \*\* indicates a P-value of <0.01

**Table S3:** Spearman correlation coefficients of SOC stock changes (limed minus control) at different soil depths with explanatory variables (forest floor layer n = 28, mineral soil n= 26).

|                                                                    | L/O <sub>f</sub> | O <sub>h</sub> | 0-5 cm          | 5-10 cm        | 10-30 cm       | 30-60 cm      |
|--------------------------------------------------------------------|------------------|----------------|-----------------|----------------|----------------|---------------|
| <b>Climate and site characteristics</b>                            |                  |                |                 |                |                |               |
| Precipitation (mm a <sup>-1</sup> )                                | 0.29             | 0.13           | 0.08            | -0.23          | 0.01           | -0.25         |
| Temperature (°C)                                                   | 0.06             | -0.28          | 0.12            | 0.09           | 0.19           | -0.09         |
| Elevation (m. asl)                                                 | 0.05             | -0.10          | 0.00            | -0.27          | -0.08          | -0.12         |
| Acid neutralization capacity (kmol <sub>c</sub> ha <sup>-1</sup> ) | <b>-0.44 *</b>   | <b>-0.46 *</b> | -0.08           | <b>-0.34 §</b> | 0.08           | 0.01          |
| Nitrogen deposition (kg N ha <sup>-1</sup> )                       | 0.04             | 0.29           | <b>-0.34 §</b>  | 0.02           | <b>-0.40 *</b> | -0.17         |
| <b>Soil properties of the control plot</b>                         |                  |                |                 |                |                |               |
| Clay (%) †                                                         | -                | -              | <b>-0.53 *</b>  | 0.00           | -0.31          | -0.16         |
| Sand (%) †                                                         | -                | -              | 0.43            | 0.13           | <b>0.50 §</b>  | 0.04          |
| SOC stock (Mg C ha <sup>-1</sup> )                                 | <b>-0.38 *</b>   | -0.06          | <b>-0.55 **</b> | -0.32          | -0.28          | -0.28         |
| C:N ratio                                                          | -0.00            | 0.03           | 0.15            | <b>0.34 §</b>  | 0.14           | 0.02          |
| Base saturation (%) ‡                                              | 0.11             | 0.04           | -0.27           | -0.08          | 0.00           | 0.15          |
| pH (H <sub>2</sub> O)                                              | 0.14             | -0.16          | -0.12           | 0.11           | -0.17          | 0.11          |
| <b>Changes in soil properties as a result of liming</b>            |                  |                |                 |                |                |               |
| Δ H <sup>+</sup>                                                   | 0.27             | 0.06           | 0.04            | <b>0.47 *</b>  | 0.26           | <b>0.49 *</b> |
| Δ Base saturation ‡                                                | -0.23            | -0.40          | 0.11            | <b>-0.33 §</b> | -0.12          | -0.26         |

Levels of significance: § p < 0.10, \* P ≤ 0.05, \*\* P ≤ 0.01, † n=15, ‡ n=11 in the forest floor layers
